# Supplementary material
Source: JCI journal article supplement (doi:10.1172/jci201633)
Supplement: sd2 [file 2]

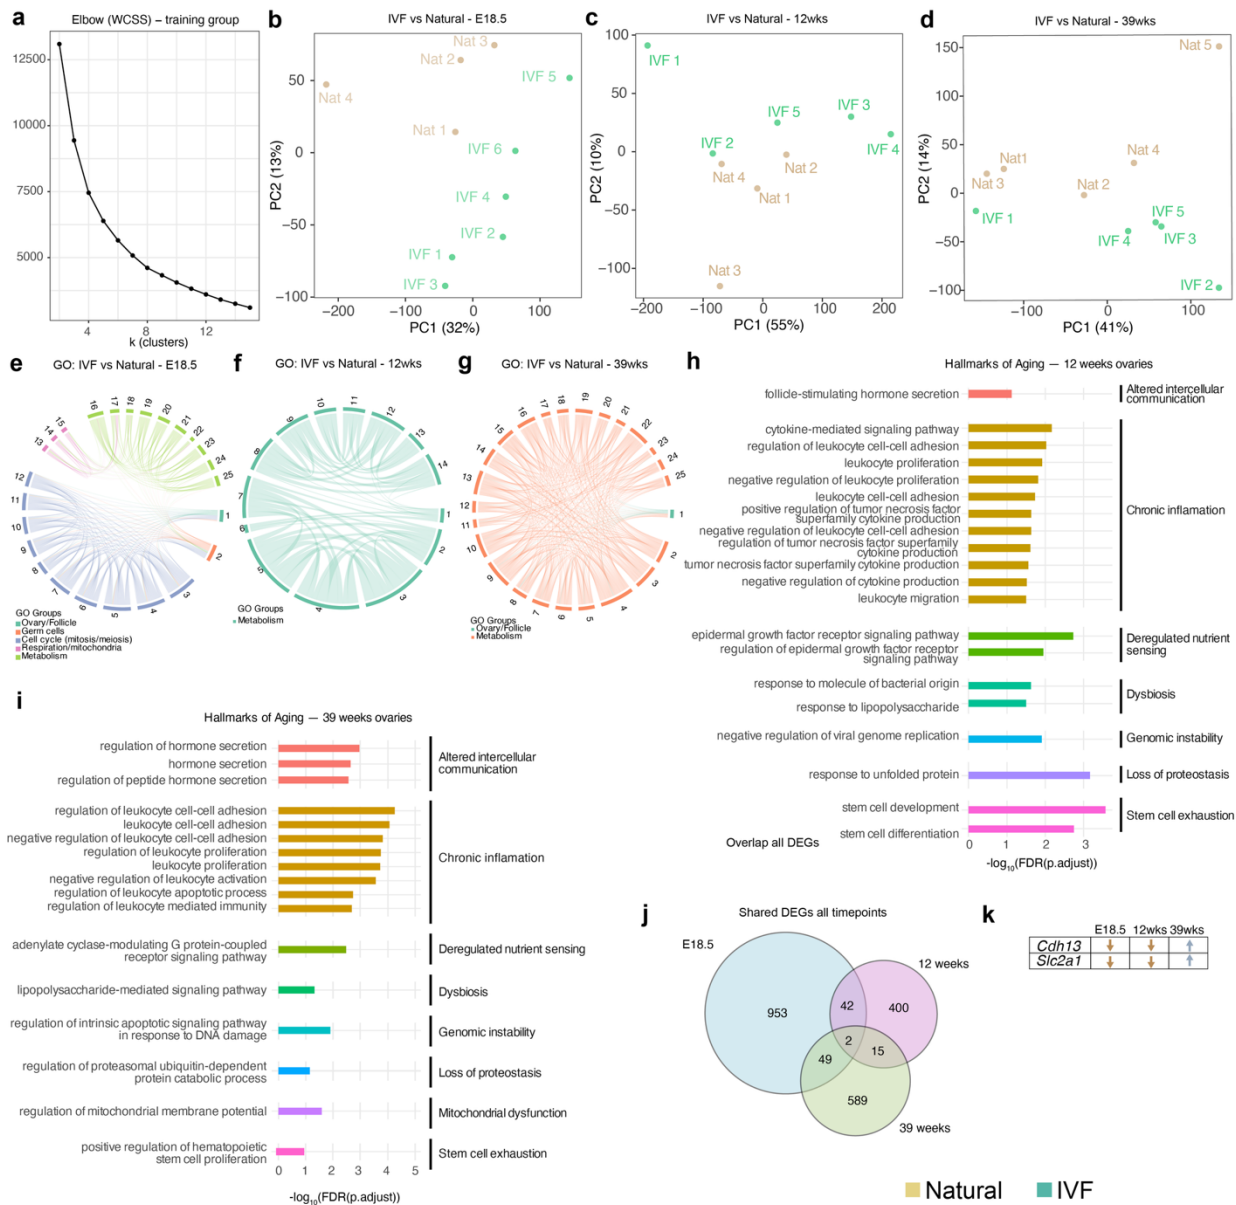

### Extended Data 1. Corresponding to main Figure 3.

**a**, Elbow: plot analysis for k selection in WCSS analysis. Principal Component Analysis (PCA) for whole ovary RNA-seq in Figure 3: **b**, E18.5; **c**, 12-weeks; **d**, 39-weeks. Chord plots for Network representation of most affected GO terms at **e**, E18.5; **f**, 12-weeks; **g**, 39-weeks. **h**, Venn diagram to find the overlap genes at the three developmental timepoints. **i**, List of genes that are shared between the different timepoints and the direction of their dysregulation.

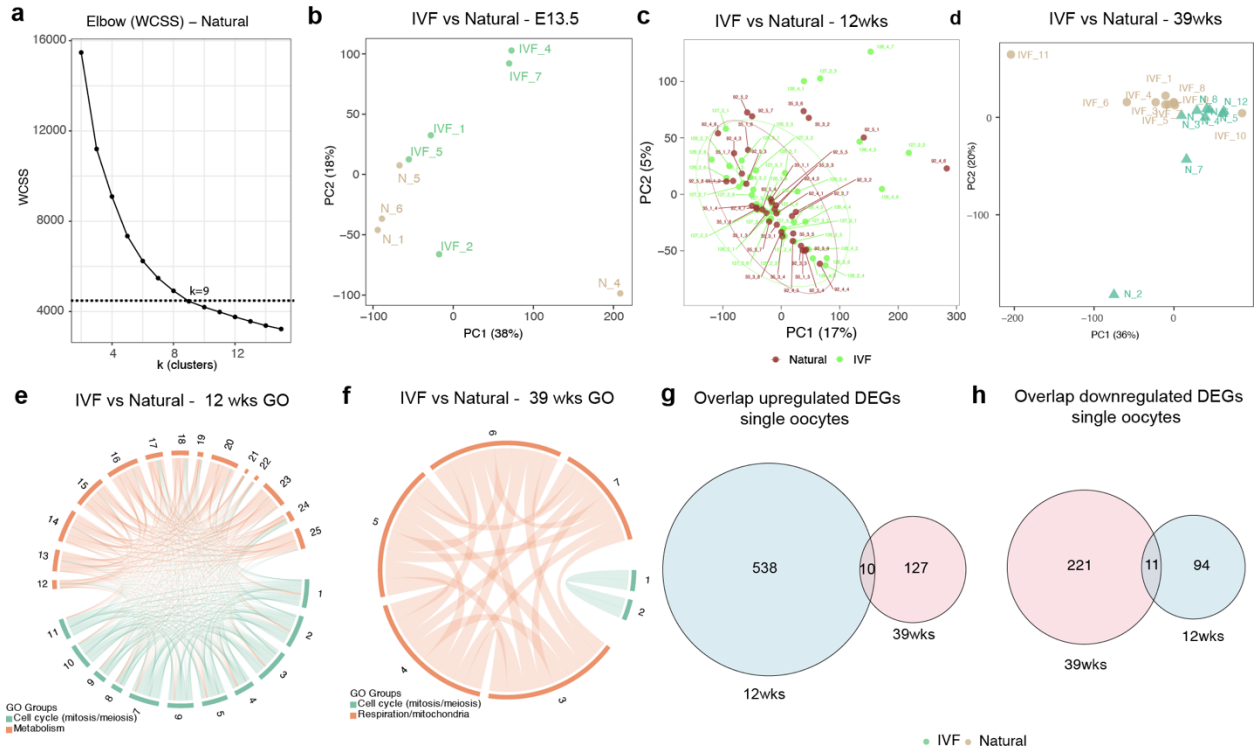

**Extended Data 2. Corresponding to main Figure 4.**

**a**, Elbow: plot analysis for k selection in WCSS analysis. Principal Component Analysis (PCA) for primordial germ cells and oocytes RNA-seq in Figure 4: **b**, E13.5; **c**, 12-weeks; **d**, 39-weeks. Chord plots for Network representation of most affected GO terms at **e**, E13.5; **f**, 12-weeks; **g**, 39-weeks. Overlap between 12 and 39 weeks for **g**, upregulated DEGs and **g**, downregulated DEGs.

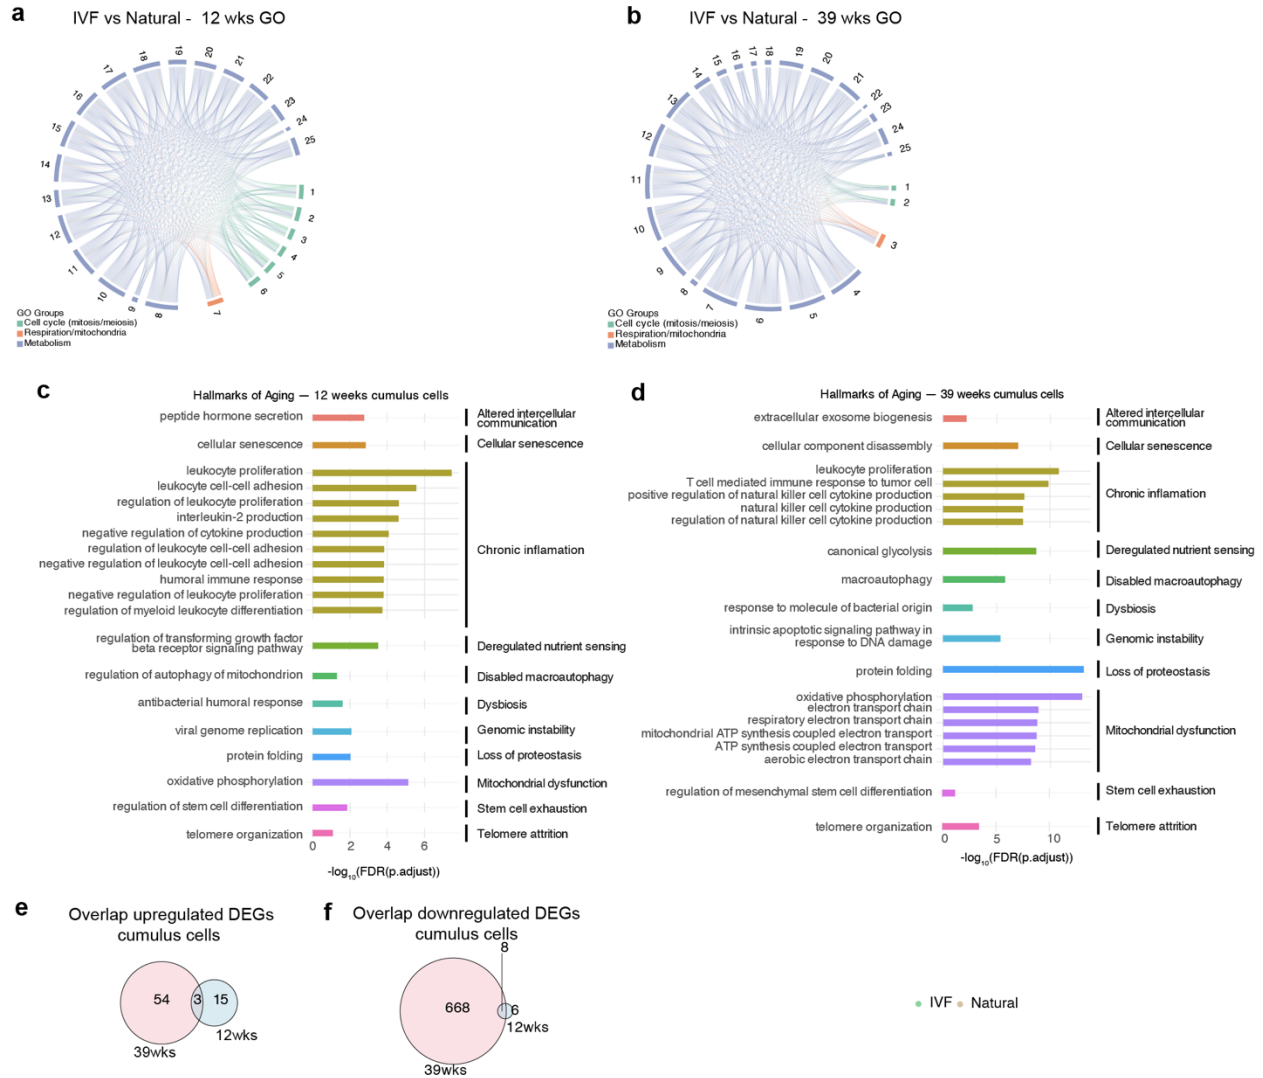

### Extended Data 3. Corresponding to main Figure 5.

Principal Component Analysis (PCA) for cumulus cells RNA-seq in Figure 4: **a**, 12 weeks; **b**, 39 weeks. Chord plots for Network representation of most affected GO terms at **c**, 12 weeks; **d**, 39 weeks. Gene ontology to identify hallmark of aging pathways based on López-Otín et al.2023: **e**, 12 weeks and **f**, 39 weeks. Overlap between 12 and 39 weeks for **g**, upregulated DEGs and **h**, downregulated DEGs.
